# Supplementary material for: Well controlled core/shell type polymeric microspheres coated with conducting polyaniline: fabrication and electrorheology
Source: Royal Society of Chemistry journal article supplement (doi:10.1039/c1ra00325a), 2011-01-01
Supplement: c1ra00325a.pdf [file c1ra00325a.pdf]

Electronic Supplementary Information

**Well Controlled Core/Shell Type Polymeric Microspheres Coated with Conducting  
Polyaniline: Fabrication and Electrorheology**

Fei Fei Fang, Ying Dan Liu, Il Sang Lee, Hyoung Jin Choi\*

*Department of Polymer Science and Engineering, Inha University, Incheon 402-751, Korea*

*E-mail: [hjchoi@inha.ac.kr](mailto:hjchoi@inha.ac.kr); Fax: +82-32-865-5178; Tel: +82-32-860-7486*

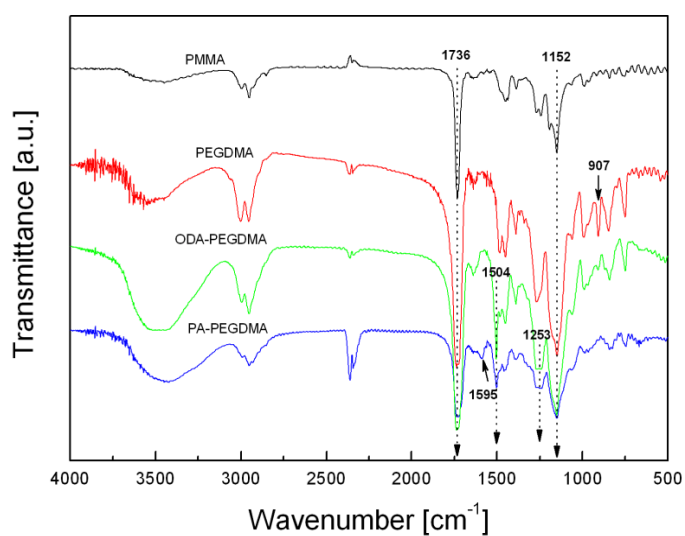

Fig. S1 FT-IR spectra of the experimental products at each step.
